# Supplementary material for: Kirigami actuators
Source: Royal Society of Chemistry journal article supplement (doi:10.1039/c7sm01693j), 2017-01-01
Supplement: c7sm01693j12.pdf [file c7sm01693j12.pdf]

## Supplementary material – Kirigami Actuators

Marcelo A. Dias<sup>\*1,2</sup>, Michael P. McCarron<sup>3</sup>, Daniel Rayneau-Kirkhope<sup>4</sup>, Paul Z. Hanakata<sup>5</sup>, David K. Campbell<sup>5</sup>, Harold S. Park<sup>3</sup>, and Douglas P. Holmes<sup>†3</sup>

<sup>1</sup>*Department of Engineering, Aarhus University, Inge Lehmanns Gade 10, 8000 Aarhus C, Denmark.*

<sup>2</sup>*Department of Physics and Astronomy, James Madison University, Harrisonburg, VA 22807, USA.*

<sup>3</sup>*Department of Mechanical Engineering, Boston University, Boston, MA, 02215, USA.*

<sup>4</sup>*Department of Applied Physics, Aalto University, FI-02150 Espoo, Finland.*

<sup>5</sup>*Department of Physics, Boston University, Boston, MA 02215, USA.*

September 28, 2017

### Methods Section

*Fabrication:* Mylar (BoPET) films were purchased from McMaster–Carr (Mylar, 8567K96), and had a thickness of  $h = 0.127$  mm. To relieve any residual stress in the films, apparent from their natural curvature, we annealed the films in the oven at  $85^{\circ}\text{C}$  under the weight of thick metal sheets for 2 hours, resulting in flat sheets. Vector patterns were drawn in Adobe Illustrator CS6, and cut with an Epilog Mini 24, 75W laser cutter in vector mode, at 80% speed and 10% power. Sheet widths of  $w = 40\text{mm}$ ,  $60\text{mm}$ ,  $80\text{mm}$ , and  $100\text{mm}$  were used, and sheet lengths of  $L = 20\text{mm}$  to  $200\text{mm}$  in linear increments of  $20\text{mm}$  were used. For the single cut experiments, cut lengths ranging from  $b = 20\text{mm}$  to  $70\text{mm}$  were used. The cut mylar films were adhered to 3mm thick acrylic sheets (McMaster–Carr, acrylic, 8560K191) with cyanoacrylate glue (McMaster-Carr, Loctite 403, 74765A53), which served as the clamped boundary conditions for the films.

*Mechanical Measurements:* Uniaxial tension tests were performed by clamping the mylar sheets to the Instron 5943 mechanical testing system, using a 500N load cell. Displacement-controlled tests were performed at a rate of  $0.15\text{mm}/\text{min}$  to a maximum extension of  $1.5\text{mm}$ . Since the mylar did not experience inelastic strains, actuation was reversible, and 3 tests were run for each sample. Actuator deformation was captured from the side with a microscopic lens (Navitar Zoom 6000) attached to a Nikon D610 camera, and from the front using a Nikon D610 camera with a Micro-NIKKOR 105mm f/2.8 Lens, a Nikon 55mm f/2.8 Lens, and a high contrast Rosco Color Filter (B&H Photo Video, ROCEK1212). The critical buckling force was determined from identifying both the slope change in the force vs. displacement curve, and the out-of-plane deflection from the microscopic imaging of the crack profile.

*Finite Element Method (FEM):* FEM simulations were undertaken using COMSOL Multiphysics 5.2<sup>1</sup> along with the Structural Mechanics Module. Shell Mechanics and Plates were the environments within COMSOL in which all of our studies were performed. A geometry matching those used in the experiment was created in COMSOL’s Design Module. Mesh refinement studies were undertaken to ensure convergence of the results. For the single cut geometry in figure 2, the sheet was modeled as an isotropic elastic thin sheet with thickness of  $h = 0.127\text{mm}$ , Young’s Modulus  $E = 3.5\text{GPa}$ , and Poisson’s ratio  $\nu = 0.38$ . The results shown in figure 2c were attained through linear buckling studies with varying thickness in the range  $h \in [0.1\text{mm}, 0.14\text{mm}]$  and

---

\*madas@eng.au.dk

†dpholmes@bu.edu

the values  $b/w \in [0.3, 0.8]$ . The in-plane results shown in figure 2a and post-buckling results in figures 2d, 3, and 4 were calculated from a stationary study with displacement ( $\Delta$ ) controlled analysis. In order to induce out-of-plane symmetry breaking, we added random small imperfections (ten orders of magnitude smaller than the sheet thickness) to the initial surface. The parameters in figure 2d varied and lay in the ranges  $h \in [0.15\text{mm}, 0.21\text{mm}]$  and  $b/w \in [0.1, 0.9]$ . For the results shown in figure 5, linear buckling studies were undertaken with the boundary at  $x = 0$  fixed in space while the boundary at  $x = L$  had an imposed displacement of  $\Delta$  in the  $x$  direction. Both of these boundaries were not permitted to rotate. All other boundaries were free. Small imperfections in the form of the first eigenmodes were then added to the initially flat geometry through use of MeshPerturb 1.0<sup>2</sup>. These imperfect geometries were then used for the stationary studies with the same boundary conditions and the same mesh density as was used in the linear studies.

*Molecular Simulations:* We used Sandia-developed open source LAMMPS Molecular Dynamics Simulator to simulate graphene sheets<sup>3</sup>. To describe the carbon-carbon interactions, we used AIREBO potential<sup>4</sup> as has been used previously in atomistic study of graphene kirigami<sup>5</sup>. The cutoffs for the Lennard-Jones and the REBO term in AIREBO potential are chosen to be 2 Å and 6.8 Å, respectively. For MoS<sub>2</sub> actuators we used the Stillinger-Weber potential developed by Jiang<sup>6</sup>, which we have previously employed to study MoS<sub>2</sub> kirigami<sup>7</sup>. Graphene with a single crack and the MoS<sub>2</sub> actuator were first relaxed for 50–200 ps at 4.2K within the NVT (fixed number of atoms  $N$ , volume  $V$ , and temperature  $T$ ) ensemble. Non-periodic boundary conditions were applied in all three directions. After the relaxation, the strains were applied by displacing both ends at a uniform rate.

## List of videos

**Legend:** FEM = Finite Element Method (The color map shows the normalized sum of the principal stresses,  $w\sigma_{ii}^p/(Eh)$ ); MD = Molecular Dynamics; EXP = Experiments.

1. Single cut
  - **Single Cut FEM:** c7sm01693j10.mov
  - **Single Cut MD:** c7sm01693j11.mov
2. Pitch and lift modes combined
  - **Pitch Lift FEM:** c7sm01693j4.mov
  - **Pitch Lift EXP:** c7sm01693j3.mov
3. Lift mode ( $z$ -axis displacement)
  - **Lift FEM:** c7sm01693j2.mov
  - **Lift EXP:** c7sm01693j1.mov
4. Roll mode (rotation about  $x$ -axis)
  - **Roll,  $x$ -rotation FEM:** c7sm01693j9.mov
  - **Roll,  $x$ -rotation EXP:** c7sm01693j8.mov
5. Pitch mode (rotation about  $y$ -axis)
  - **Pitch,  $y$ -rotation FEM:** c7sm01693j6.mov
  - **Pitch,  $y$ -rotation EXP:** c7sm01693j5.mov
  - **Pitch,  $y$ -rotation MD:** c7sm01693j7.mov

6. Yaw mode (rotation about z-axis)
  - **Yaw, z-rotation FEM:** c7sm01693j13.mov
  - **Yaw, z-rotation EXP:** c7sm01693j14.mov

## References

1. COMSOL. Comsol multiphysics. <http://www.comsol.com/comsol-multiphysics>, Last accessed 14 July 2017.
2. S. K. Saha and M. L. Culpepper. Meshperturb: Matlab codes for mesh perturbation and automated pre and post processing of post-bifurcation analyses via comsol. 2014.
3. Lammmps. <http://lammmps.sandia.gov>, 2012.
4. S. J. Stuart, A. B. Tutein, and J. A. Harrison. A reactive potential for hydrocarbons with intermolecular interactions. *The Journal of chemical physics*, 112(14):6472–6486, 2000.
5. Z. Qi, D. K. Campbell, and H. S. Park. Atomistic simulations of tension-induced large deformation and stretchability in graphene kirigami. *Physical Review B*, 90(24):245437, 2014.
6. J.-W. Jiang. Parametrization of stillinger–weber potential based on valence force field model: application to single-layer MoS<sub>2</sub> and black phosphorus. *Nanotechnology*, 26(31):315706, 2015.
7. P. Z. Hanakata, Z. Qi, D. K. Campbell, and H. S. Park. Highly stretchable MoS<sub>2</sub> kirigami. *Nanoscale*, 8(1):458–463, 2016.
